# Supplementary material for: Development of a Model to Predict Healing of Chronic Wounds Within 12 Weeks
Source: PubMed Central journal article supplement (PMC7522633; doi:10.1089/wound.2019.1091), 2020-09-17
Supplement: Supp_FigS1-TableS1-S3.pdf [file Supp_FigS1-TableS1-S3.pdf]

## Supplementary Data

**Consort diagram**

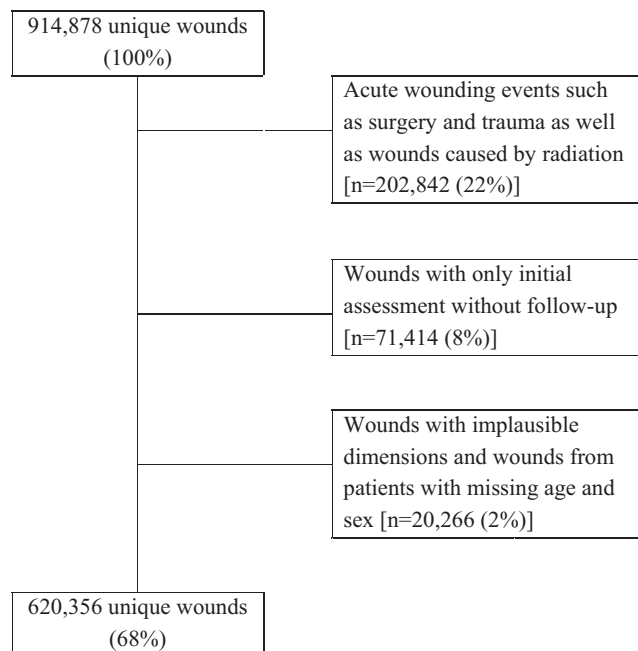

**Supplementary Figure S1.** Consort diagram.

**Supplementary Table S2.** Classification of wound stages

| EMR Classification                                                                             | Model Classification |
|------------------------------------------------------------------------------------------------|----------------------|
| NULL                                                                                           | Unknown              |
| Category/stage I                                                                               | Superficial          |
| Category/stage II                                                                              | Superficial          |
| Category/stage III                                                                             | Full thickness       |
| Category/stage IV                                                                              | Full thickness       |
| Deep tissue pressure injury persistent nonblanchable deep red, maroon, or purple discoloration | Unknown              |
| Eschar covered                                                                                 | Unknown              |
| Full thickness                                                                                 | Full thickness       |
| Full thickness with exposed support structures                                                 | Full thickness       |
| Full thickness without exposed support structures                                              | Full thickness       |
| Grade 0                                                                                        | Partial thickness    |
| Grade 1                                                                                        | Partial thickness    |
| Grade 2                                                                                        | Full thickness       |
| Grade 3                                                                                        | Full thickness       |
| Grade 4                                                                                        | Full thickness       |
| Grade 5                                                                                        | Full thickness       |
| Medical device related pressure injury                                                         | Unknown              |
| Mucosal membrane pressure injury                                                               | Unknown              |
| NA                                                                                             | Unknown              |
| Partial thickness                                                                              | Partial thickness    |
| Stage 1 Pressure injury                                                                        | Partial thickness    |
| Stage 2 Pressure injury                                                                        | Partial thickness    |
| Stage 3 Pressure injury                                                                        | Full thickness       |
| Stage 4 Pressure injury                                                                        | Full thickness       |
| Suspected deep tissue injury                                                                   | Full thickness       |
| Unable to visualize wound bed                                                                  | Unknown              |
| Unclassifiable                                                                                 | Unknown              |
| Unstageable pressure injury obscured full-thickness skin and tissue loss                       | Unknown              |
| Unstageable/unclassified                                                                       | Unknown              |

NA, not applicable.

**Supplementary Table S1.** International Classification of Diseases-9/10 codes and clinical codes used for identification of comorbidities

| Comorbidity                           | Medical History Item Descriptions in EMR System and ICD-9/10 Codes                                |
|---------------------------------------|---------------------------------------------------------------------------------------------------|
| Dementia/Alzheimer's                  | Dementia<br>331.xx, F03, G30                                                                      |
| Coronary artery disease               | Coronary artery disease, myocardial infarction<br>410-414.xx, I20-I25                             |
| Congestive heart failure              | Congestive heart failure<br>428.xx, I50                                                           |
| Chronic obstructive pulmonary disease | COPD<br>490-492.xx, 496.xx, J41-J44                                                               |
| Diabetes                              | Type I diabetes, type II diabetes, "%Diab%"<br>250.xx, E08-E13, Z79.4                             |
| Peripheral vascular diseases          | Peripheral arterial disease, peripheral venous disease<br>443.xx, 447.xx, 448.xx, I70, I73, I79.9 |
| Hypertension                          | Hypertension                                                                                      |

COPD, chronic obstructive pulmonary disease; EMR, electronic medical record; ICD, International Classification of Diseases.

**Supplementary Table S3.** Area under the curve and Akaike information criterion in training and validation sets

| Model Type                                               | Training Set                  |           | Validation Set |           |
|----------------------------------------------------------|-------------------------------|-----------|----------------|-----------|
|                                                          | AUC (95% Confidence Interval) | AIC       | AUC            | AIC       |
| Model 1: Demographics only                               | 0.557 (0.555–0.558)           | 581,902.2 | 0.556          | 249,547.7 |
| Model 2: Demographics + clinical characteristics         | 0.603 (0.601–0.605)           | 572,943.0 | 0.605          | 245,548.4 |
| Model 3: Demographics + clinical + wound characteristics | 0.712 (0.710–0.713)           | 526,368.3 | 0.712          | 225,519.3 |

AIC, Akaike information criterion; AUC, area under the curve.
